# Supplementary material for: Formulation and clinical translation of [177Lu]Lu-trastuzumab for radioimmunotheranostics of metastatic breast cancer
Source: Royal Society of Chemistry journal article supplement (doi:10.1039/d0md00319k), 2020-11-14
Supplement: d0md00319k1.pdf [file d0md00319k1.pdf]

**Supporting Information**

**Formulation and Clinical Translation of [<sup>177</sup>Lu]Lu-Trastuzumab for  
Radioimmunotherapy of Metastatic Breast Cancer**

Mohini Guleria<sup>a</sup>, Rohit Sharma<sup>a</sup>, Jeyachitra Amirdhanayagam<sup>a</sup>, Haladhar D. Sarma<sup>b</sup>,  
Venkatesh Rangarajan<sup>c</sup>, Ashutosh Dash<sup>a,d</sup>, Tapas Das<sup>a,d\*</sup>

<sup>a</sup>Radiopharmaceuticals Division, Bhabha Atomic Research Centre,  
Trombay, Mumbai - 400085, India

<sup>b</sup>Radiation Biology and Health Sciences Division,  
Bhabha Atomic Research Centre, Trombay, Mumbai - 400085, India

<sup>c</sup>Department of Nuclear Medicine and Molecular Imaging, Tata Memorial Hospital,  
Parel, Mumbai - 400 012, INDIA

<sup>d</sup>Homi Bhabha National Institute, Anushaktinagar, Mumbai - 400094, India

**Author for Correspondence:      Tapas Das**

Radiopharmaceuticals Division

Bhabha Atomic Research Centre

Trombay, Mumbai - 400085, **INDIA**

Telephone                              91-22-2559 0613

Fax                                        91-22-2550 5151

e-mail                                    [tdas@barc.gov.in](mailto:tdas@barc.gov.in)

| <b>Sr. No.</b> | <b>Title</b>                                                                                                                                                                                                                                                             | <b>Page no.</b> |
|----------------|--------------------------------------------------------------------------------------------------------------------------------------------------------------------------------------------------------------------------------------------------------------------------|-----------------|
| <b>1</b>       | <b>Figure S1:</b> HPLC chromatogram depicting UV-profile of DOTA-trastuzumab conjugate                                                                                                                                                                                   | <b>S4</b>       |
| <b>2</b>       | <b>Figure S2:</b> Graphical representation of variation of percentage radiochemical yield with reaction pH                                                                                                                                                               | <b>S5</b>       |
| <b>3</b>       | <b>Figure S3:</b> Graphical representation of variation of percentage radiochemical yield with incubation period                                                                                                                                                         | <b>S6</b>       |
| <b>4</b>       | <b>Figure S4:</b> HPLC profiles depicting stability pattern of [ <sup>177</sup> Lu]Lu-trastuzumab prepared without adding any radioprotecting agent at the same day of preparation as well as different post-preparation time-points viz. 1, 3 and 7 d                   | <b>S7</b>       |
| <b>5</b>       | <b>Figure S5:</b> HPLC profiles depicting stability pattern of [ <sup>177</sup> Lu]Lu-trastuzumab prepared using ascorbic acid as the radioprotecting agent, obtained at the same day of preparation as well as different post-preparation time-points viz. 1, 3 and 7 d | <b>S8</b>       |
| <b>6</b>       | <b>Figure S6:</b> HPLC profiles depicting stability pattern of [ <sup>177</sup> Lu]Lu-trastuzumab prepared using gentisic acid as the radioprotecting agent, obtained at the same day of preparation as well as different post-preparation time points viz. 1, 3 and 7 d | <b>S9</b>       |
| <b>7</b>       | <b>Figure S7:</b> Paper Chromatography (PC) pattern of [ <sup>177</sup> Lu]Lu-trastuzumab complex                                                                                                                                                                        | <b>S10</b>      |

|   |                                                                                                                                                                                                                                                     |            |
|---|-----------------------------------------------------------------------------------------------------------------------------------------------------------------------------------------------------------------------------------------------------|------------|
| 8 | <b>Figure S8:</b> Graphical representation of variation in percentage radiochemical purity of [ <sup>177</sup> Lu]Lu-trastuzumab in buffer, serum and buffer containing EDTA in 50 molar excess of Lu content at 1 , 4 , 5 and 7 d post-preparation | <b>S11</b> |
| 9 | <b>Figure S9:</b> Graphical representation of saturation binding assay of [ <sup>177</sup> Lu]Lu-trastuzumab carried out using HER2 protein                                                                                                         | <b>S12</b> |

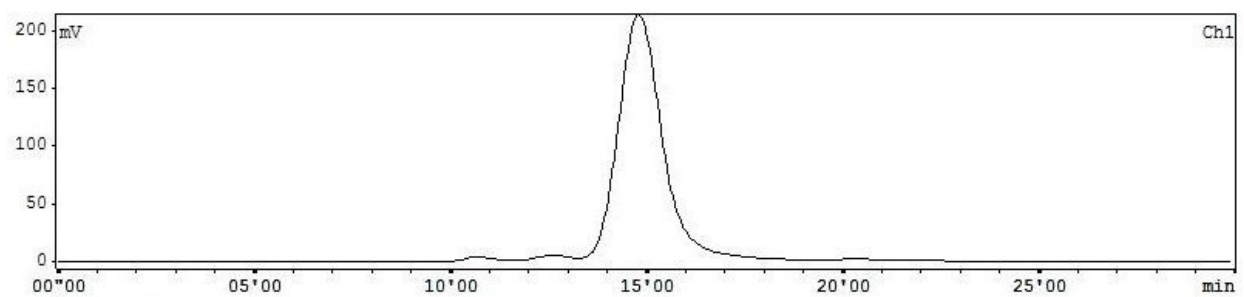

**Figure S1:** HPLC chromatogram depicting UV-profile of DOTA-trastuzumab conjugate

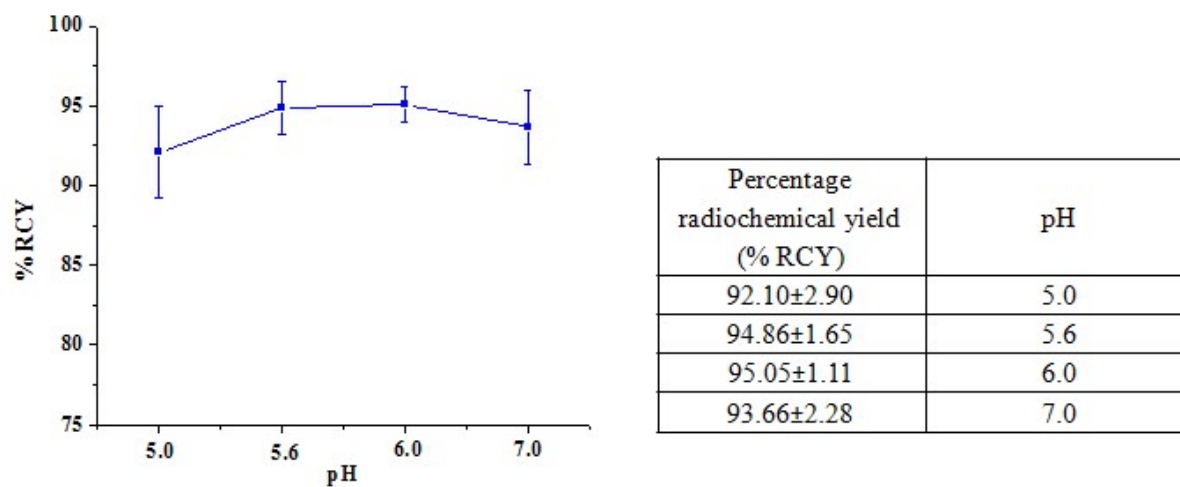

**Figure S2:** Graphical representation of variation of percentage radiochemical yield with reaction pH

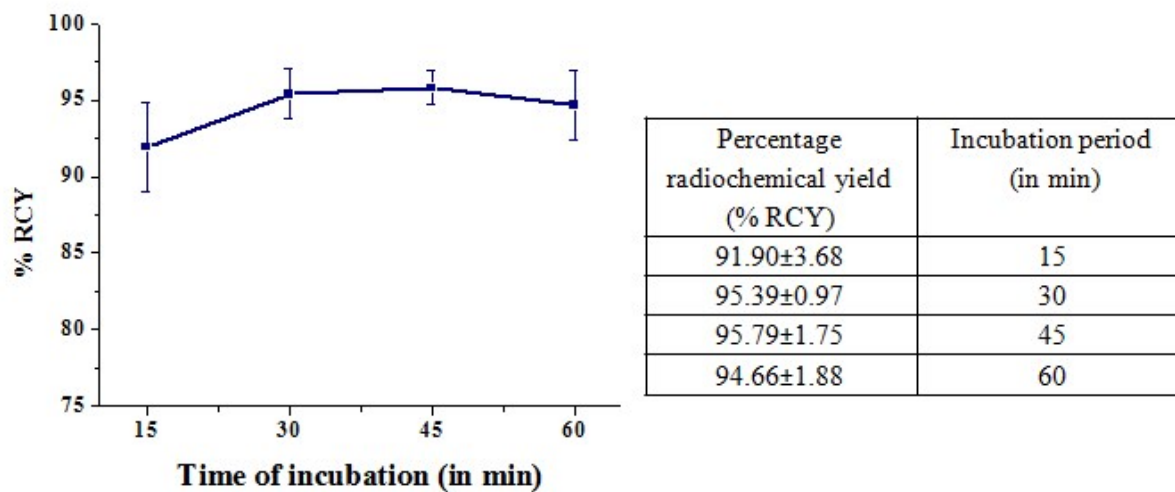

**Figure S3:** Graphical representation of variation of percentage radiochemical yield with incubation period

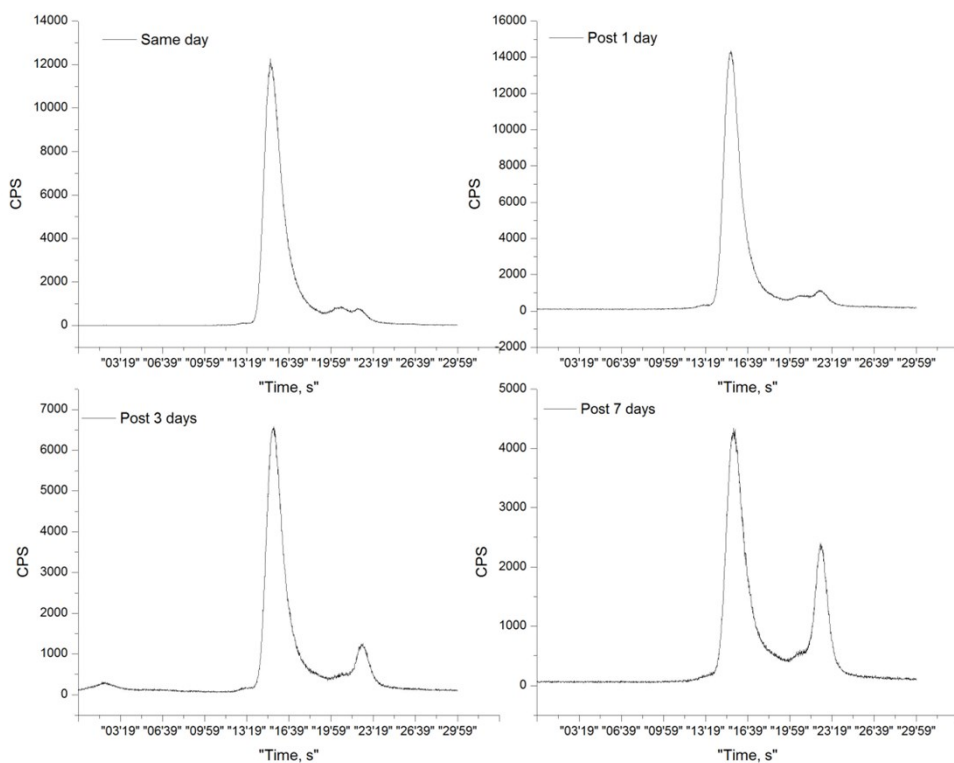

**Figure S4:** HPLC profiles depicting stability pattern of  $[^{177}\text{Lu}]\text{Lu-trastuzumab}$  prepared without adding any radioprotecting agent at the same day of preparation as well as different post-preparation time-points viz. 1, 3 and 7 d

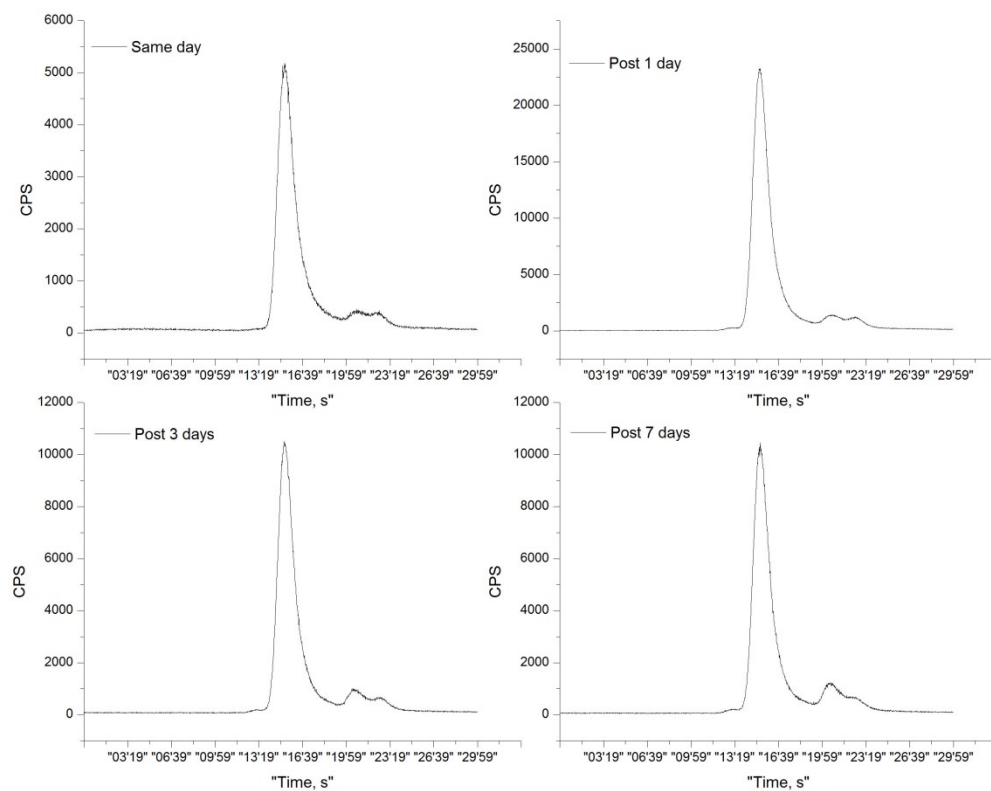

**Figure S5:** HPLC profiles depicting stability pattern of [ $^{177}\text{Lu}$ ]Lu-trastuzumab prepared using ascorbic acid as the radioprotecting agent, obtained at the same day of preparation as well as different post-preparation time-points viz. 1, 3 and 7 d



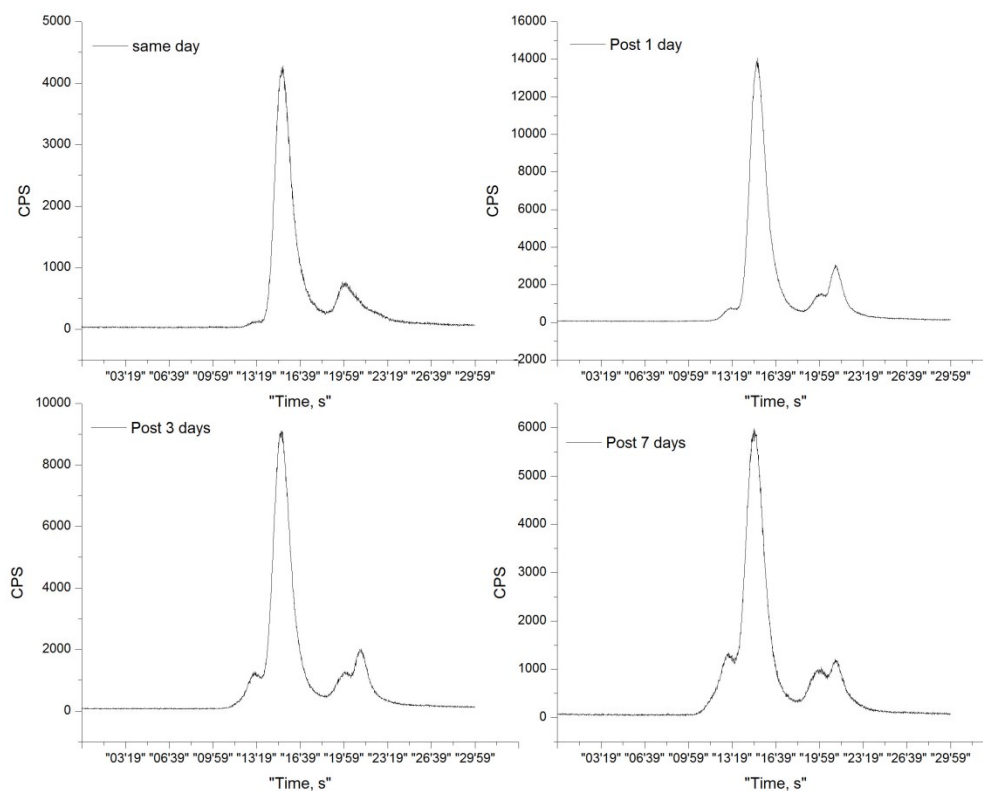

**Figure S6:** HPLC profiles depicting stability pattern of [ $^{177}\text{Lu}$ ]Lu-trastuzumab prepared using gentisic acid as the radioprotecting agent, obtained at the same day of preparation as well as different post-preparation time points viz. 1, 3 and 7 d

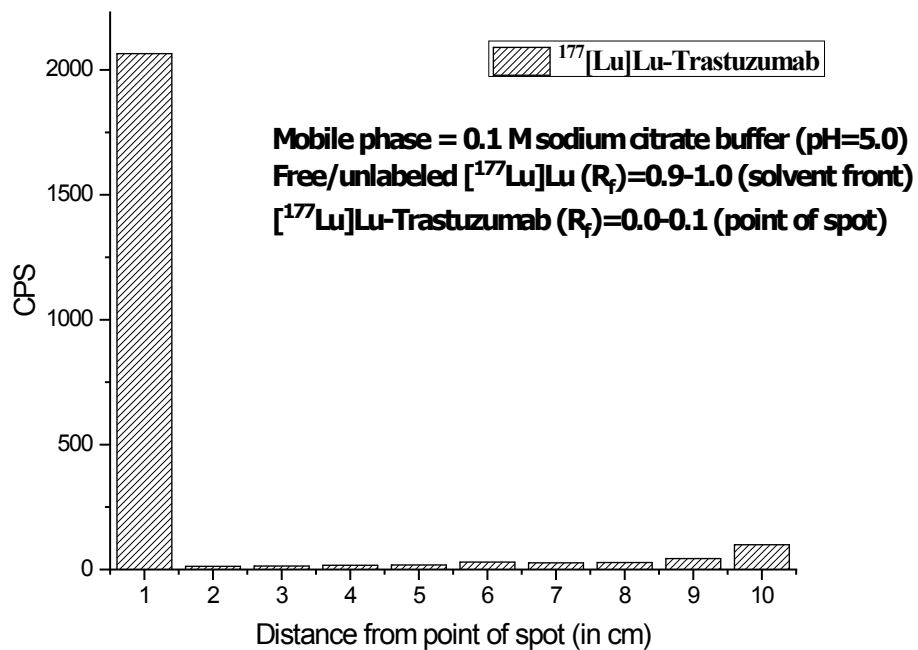

**Figure S7:** Paper Chromatography (PC) pattern of [<sup>177</sup>Lu]Lu-trastuzumab complex

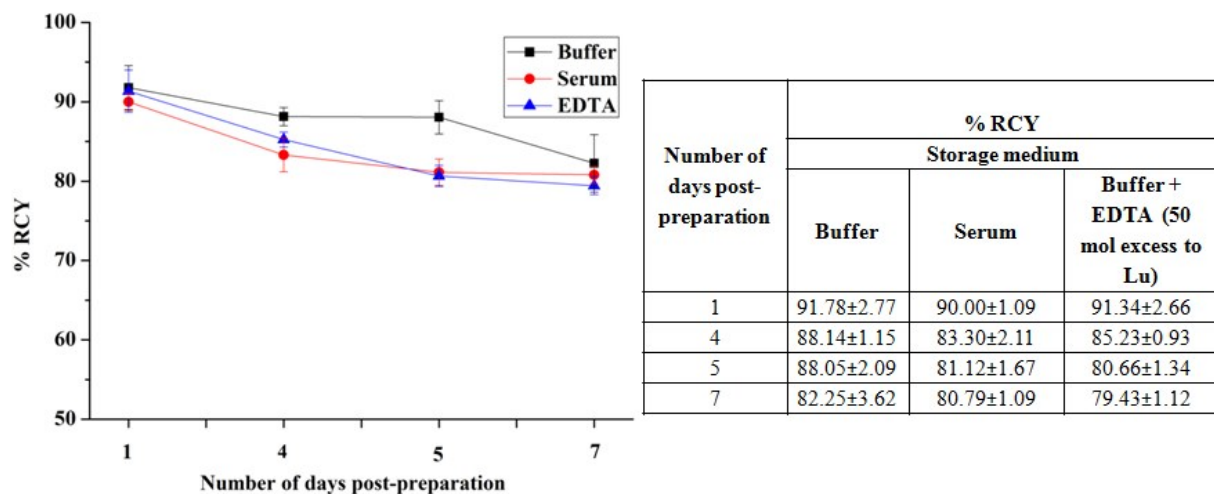

**Figure S8:** Graphical representation of variation in percentage radiochemical purity (%RCP) of  $[^{177}\text{Lu}]\text{Lu}$ -trastuzumab in buffer, serum and buffer containing EDTA in 50 molar excess of Lu content at 1 , 4 , 5 and 7 d post-preparation

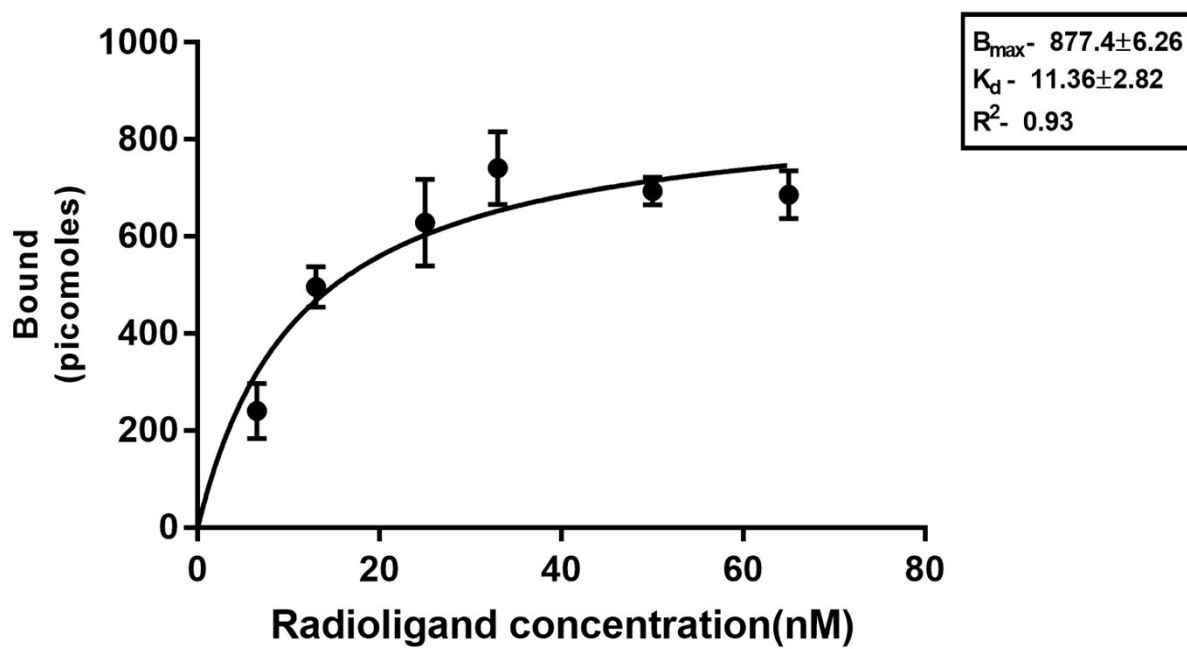

**Figure S9:** Graphical representation of saturation binding assay of  $[^{177}\text{Lu}]\text{Lu-trastuzumab}$  carried out using HER2 protein.
